# Supplementary material for: Impact of Rapid Ventricular Pacing on Outcome After Transcatheter Aortic Valve Replacement
Source: PubMed Central journal article supplement — J Am Heart Assoc. 2018 Jul 9;7(14):e009038. doi: 10.1161/JAHA.118.009038 (PMC6064853; doi:10.1161/jaha.118.009038), 2018-07-09
Supplement: JAH3-7-e009038-s001.pdf [file JAH3-7-e009038-s001.pdf]

# **SUPPLEMENTAL MATERIAL**

**Table S1. Baseline characteristics by cumulative pacing time.**

|                                             | <b>T1<br/>(3-24 sec)<br/>N=119</b> | <b>T2<br/>(25-35 sec)<br/>N=114</b> | <b>T3<br/>(&gt;35 sec)<br/>N=119</b> | <b>P-<br/>value</b> |
|---------------------------------------------|------------------------------------|-------------------------------------|--------------------------------------|---------------------|
| Age (years)                                 | 81±7                               | 82±7                                | 81±7                                 | 0.35                |
| Male                                        | 51(43)                             | 60(53)                              | 62(52)                               | 0.24                |
| Diabetes mellitus                           | 48(40)                             | 45(40)                              | 48(41)                               | 0.99                |
| Hypertension                                | 99(83)                             | 96(84)                              | 102(86)                              | 0.87                |
| Hyperlipidemia                              | 90(76)                             | 75(66)                              | 84(72)                               | 0.25                |
| Chronic renal failure                       | 26(22)                             | 29(26)                              | 30(26)                               | 0.72                |
| Dialysis                                    | 2(1.7)                             | 1(0.9)                              | 2(1.7)                               | 0.83                |
| Chronic lung disease                        | 16(14)                             | 14(12)                              | 27(23)                               | 0.06                |
| Peripheral vascular disease                 | 12(10)                             | 12(11)                              | 16(14)                               | 0.63                |
| Prior myocardial infarction                 | 27(23)                             | 38(34)                              | 27(23)                               | 0.11                |
| Prior coronary bypass surgery               | 26(22)                             | 19(17)                              | 27(23)                               | 0.45                |
| Prior percutaneous coronary<br>intervention | 29(25)                             | 44(39)                              | 33(28)                               | 0.044               |
| Prior cerebrovascular accident              | 17(14)                             | 21(18)                              | 15(13)                               | 0.46                |
| Euroscore II                                | 4.6±4.5                            | 4.2±4.8                             | 5.9±6.4                              | 0.04                |
| STS score                                   | 4.7±2.9                            | 5.2±3.2                             | 4.9±2.7                              | 0.49                |
| Atrial fibrillation/flutter                 | 31(27)                             | 30(26)                              | 40(34)                               | 0.31                |
| Permanent pacemaker                         | 11(9.2)                            | 10(8.8)                             | 7(6)                                 | 0.61                |
| Left ventricular ejection fraction<br>>50%  | 92(81)                             | 82(76)                              | 85(74)                               | 0.46                |
| SPAP mmHg                                   | 48±15                              | 45±12                               | 47±14                                | 0.51                |

All numbers expressed as mean±SD or n(%)

STS- Society of Thoracic Surgeons; SPAP- estimated systolic pulmonary artery pressure

**Table S2. Procedural characteristics by cumulative pacing time.**

|                                   | <b>T1<br/>(3-24 sec)<br/>N=119</b> | <b>T2<br/>(25-35 sec)<br/>N=114</b> | <b>T3<br/>(&gt;35 sec)<br/>N=119</b> | <b>P-value</b> |
|-----------------------------------|------------------------------------|-------------------------------------|--------------------------------------|----------------|
| Self expandable valve             | 102(86)                            | 74(65)                              | 24(20)                               | <0.001         |
| Balloon expandable valve          | 17(14)                             | 40(35)                              | 95(80)                               | <0.001         |
| Predilation                       | 69(58)                             | 87(76)                              | 106(89)                              | <0.001         |
| Post-dilation                     | 39(33)                             | 22(20)                              | 26(22)                               | 0.05           |
| Post-procedural paravalvular leak |                                    |                                     |                                      | 0.35           |
| none-mild                         | 105(88)                            | 98(86)                              | 92(77)                               |                |
| moderate                          | 13(11)                             | 15(13)                              | 26(22)                               |                |
| severe                            | 1(0.8)                             | 1(0.9)                              | 1(0.8)                               |                |

All numbers expressed as n(%)
